# Supplementary material for: The effect of long-term poor sleep quality on risk of back-related disability and the modifying role of physical activity
Source: PubMed Central journal article supplement (PMC8319142; doi:10.1038/s41598-021-94845-7), 2021-07-28
Supplement: 41598_2021_94845_MOESM1_ESM.pdf [file 41598_2021_94845_MOESM1_ESM.pdf]

## **SUPPLEMENTARY MATERIAL**

### **The effect of long-term poor sleep quality on risk of back-related disability and the modifying role of physical activity**

Eivind Schjelderup Skarpsno<sup>1,2\*</sup>, Tom Ivar Lund Nilsen<sup>1,3</sup>, Paul Jarle Mork<sup>1</sup>

<sup>1</sup>Department of Public Health and Nursing, Norwegian University of Science and Technology

(NTNU), Trondheim, Norway, <sup>2</sup>Department of Neurology and Clinical Neurophysiology, St. Olavs

Hospital, Trondheim, Norway, <sup>3</sup>Clinic of Anaesthesia and Intensive Care, St Olavs Hospital,

Trondheim University Hospital, Trondheim, Norway,

\*Corresponding author: Eivind Schjelderup Skarpsno, PhD, Department of Public Health and Nursing, Norwegian University of Science and Technology (NTNU), 7491 Trondheim, Norway. E-mail: [eivind.s.skarpsno@ntnu.no](mailto:eivind.s.skarpsno@ntnu.no), phone: +47 97521297

**Supplementary table 1.** Risk of chronic back pain and back-related disability at follow-up in 2017-19 associated with changes in sleep quality from 1995-97 to 2006-08 and adherence to physical activity recommendations in 2006-08. People reporting use of pain medication in 1995-97 and/or 2006-08 were excluded from the analysis.

| Risk of back pain and change in sleep quality from 1995-97 to 2006-08 | Meeting physical activity guidelines |              |                               |                                         | Not meeting physical activity guidelines |              |                               |                                         |
|-----------------------------------------------------------------------|--------------------------------------|--------------|-------------------------------|-----------------------------------------|------------------------------------------|--------------|-------------------------------|-----------------------------------------|
|                                                                       | No. of persons                       | No. of cases | Age-adjusted, RR <sup>a</sup> | Multi-adjusted RR (95% CI) <sup>b</sup> | No. of persons                           | No. of cases | Age-adjusted, RR <sup>a</sup> | Multi-adjusted RR (95% CI) <sup>b</sup> |
| <b>Chronic back pain</b>                                              |                                      |              |                               |                                         |                                          |              |                               |                                         |
| Remained good sleep                                                   | 2,742                                | 474          | 1.00                          | 1.00 (reference)                        | 2,350                                    | 432          | 1.08                          | 1.03 (0.91-1.17)                        |
| Poor sleep to good sleep                                              | 158                                  | 35           | 1.35                          | 1.29 (0.93-1.79)                        | 206                                      | 49           | 1.36                          | 1.27 (0.94-1.70)                        |
| Good sleep to poor sleep                                              | 412                                  | 91           | 1.30                          | 1.27 (1.03-1.57)                        | 462                                      | 106          | 1.44                          | 1.31 (1.07-1.60)                        |
| Remained poor sleep                                                   | 148                                  | 35           | 1.57                          | 1.40 (1.00-1.96)                        | 182                                      | 50           | 1.88                          | 1.66 (1.29-2.14)                        |
| <b>Back-related disability</b>                                        |                                      |              |                               |                                         |                                          |              |                               |                                         |
| Remained good sleep                                                   | 2,742                                | 178          | 1.00                          | 1.00 (reference)                        | 2,350                                    | 178          | 1.19                          | 1.18 (0.95-1.46)                        |
| Poor sleep to good sleep                                              | 158                                  | 16           | 1.71                          | 1.63 (0.96-2.76)                        | 206                                      | 28           | 1.86                          | 1.82 (1.18-2.82)                        |
| Good sleep to poor sleep                                              | 412                                  | 47           | 1.63                          | 1.80 (1.31-2.49)                        | 462                                      | 49           | 1.81                          | 1.64 (1.18-2.28)                        |
| Remained poor sleep                                                   | 148                                  | 17           | 1.79                          | 1.79 (1.05-3.06)                        | 182                                      | 28           | 2.35                          | 2.18 (1.42-3.34)                        |

Abbreviations: CI, confidence interval; RR, risk ratio

<sup>a</sup>Adjusted for age (continuous)

<sup>b</sup>Adjusted for age (continuous), sex (women, men), education (primary school, high school, college ≤4 years, college >4 years), body mass index (continuous), relative change in body weight (continuous), and smoking (never smoked, former smoker, current low-intensity smoker [ $<10$  cigarettes per day], medium-intensity smoker [10-19 cigarettes per day], high-intensity smoker [20 or more cigarettes per day])

**Supplementary table 2.** Risk of chronic back pain and back-related disability at follow-up in 2017-19 associated with changes in sleep quality from 1995-97 to 2006-08 and adherence to physical activity recommendations in 2006-08. People reporting sleep apnea and/or restless legs syndrome in 1995-97 and/or 2006-08 were excluded from the analysis.

| Risk of back pain and change in sleep quality from 1995-97 to 2006-08 | Meeting physical activity guidelines |              |                               |                                         | Not meeting physical activity guidelines |              |                               |                                         |
|-----------------------------------------------------------------------|--------------------------------------|--------------|-------------------------------|-----------------------------------------|------------------------------------------|--------------|-------------------------------|-----------------------------------------|
|                                                                       | No. of persons                       | No. of cases | Age-adjusted, RR <sup>a</sup> | Multi-adjusted RR (95% CI) <sup>b</sup> | No. of persons                           | No. of cases | Age-adjusted, RR <sup>a</sup> | Multi-adjusted RR (95% CI) <sup>b</sup> |
| <b>Chronic back pain</b>                                              |                                      |              |                               |                                         |                                          |              |                               |                                         |
| Remained good sleep                                                   | 3,363                                | 597          | 1.00                          | 1.00 (reference)                        | 2,861                                    | 533          | 1.08                          | 1.00 (0.90-1.12)                        |
| Poor sleep to good sleep                                              | 194                                  | 46           | 1.35                          | 1.34 (1.00-1.78)                        | 250                                      | 59           | 1.36                          | 1.21 (0.92-1.59)                        |
| Good sleep to poor sleep                                              | 501                                  | 112          | 1.30                          | 1.23 (1.01-1.49)                        | 560                                      | 128          | 1.44                          | 1.29 (1.07-1.55)                        |
| Remained poor sleep                                                   | 187                                  | 50           | 1.57                          | 1.53 (1.18-2.00)                        | 224                                      | 62           | 1.88                          | 1.60 (1.28-2.01)                        |
| <b>Back-related disability</b>                                        |                                      |              |                               |                                         |                                          |              |                               |                                         |
| Remained good sleep                                                   | 3,486                                | 229          | 1.00                          | 1.00 (reference)                        | 3,004                                    | 218          | 1.19                          | 1.09 (0.90-1.32)                        |
| Poor sleep to good sleep                                              | 207                                  | 21           | 1.71                          | 1.65 (1.06-2.60)                        | 270                                      | 32           | 1.86                          | 1.75 (1.20-2.57)                        |
| Good sleep to poor sleep                                              | 557                                  | 53           | 1.63                          | 1.52 (1.12-2.06)                        | 614                                      | 58           | 1.81                          | 1.55 (1.15-2.10)                        |
| Remained poor sleep                                                   | 208                                  | 19           | 1.79                          | 1.48 (0.90-2.44)                        | 255                                      | 30           | 2.35                          | 1.80 (1.19-2.74)                        |

Abbreviations: CI, confidence interval; RR, risk ratio

<sup>a</sup>Adjusted for age (continuous)

<sup>b</sup>Adjusted for age (continuous), sex (women, men), education (primary school, high school, college ≤4 years, college >4 years), body mass index (continuous), relative change in body weight (continuous), and smoking (never smoked, former smoker, current low-intensity smoker [<10 cigarettes per day], medium-intensity smoker [10-19 cigarettes per day], high-intensity smoker [20 or more cigarettes per day])

**Supplementary table 3.** Risk of chronic back pain and back-related disability at follow-up in 2017-19 associated with changes in sleep quality from 1995-97 to 2006-08 and adherence to physical activity recommendations in 2006-08. Main analysis repeated with additional adjustment for physical work demands and shift work.

| Risk of back pain and change in sleep quality from 1995-97 to 2006-08 | Meeting physical activity guidelines |              |                               |                                         | Not meeting physical activity guidelines |              |                               |                                         |
|-----------------------------------------------------------------------|--------------------------------------|--------------|-------------------------------|-----------------------------------------|------------------------------------------|--------------|-------------------------------|-----------------------------------------|
|                                                                       | No. of persons                       | No. of cases | Age-adjusted, RR <sup>a</sup> | Multi-adjusted RR (95% CI) <sup>b</sup> | No. of persons                           | No. of cases | Age-adjusted, RR <sup>a</sup> | Multi-adjusted RR (95% CI) <sup>b</sup> |
| <b>Chronic back pain</b>                                              |                                      |              |                               |                                         |                                          |              |                               |                                         |
| Remained good sleep                                                   | 3,486                                | 636          | 1.00                          | 1.00 (reference)                        | 3,004                                    | 568          | 1.08                          | 1.01 (0.91-1.13)                        |
| Poor sleep to good sleep                                              | 207                                  | 50           | 1.35                          | 1.32 (1.00-1.75)                        | 270                                      | 66           | 1.36                          | 1.20 (0.92-1.56)                        |
| Good sleep to poor sleep                                              | 557                                  | 130          | 1.30                          | 1.27 (1.06-1.52)                        | 614                                      | 146          | 1.44                          | 1.31 (1.10-1.55)                        |
| Remained poor sleep                                                   | 208                                  | 56           | 1.57                          | 1.46 (1.14-1.87)                        | 255                                      | 75           | 1.88                          | 1.66 (1.35-2.04)                        |
| <b>Back-related disability</b>                                        |                                      |              |                               |                                         |                                          |              |                               |                                         |
| Remained good sleep                                                   | 3,486                                | 242          | 1.00                          | 1.00 (reference)                        | 3,004                                    | 239          | 1.19                          | 1.11 (0.92-1.34)                        |
| Poor sleep to good sleep                                              | 207                                  | 23           | 1.71                          | 1.69 (1.11-2.60)                        | 270                                      | 34           | 1.86                          | 1.59 (1.08-2.32)                        |
| Good sleep to poor sleep                                              | 557                                  | 62           | 1.63                          | 1.57 (1.18-2.08)                        | 614                                      | 69           | 1.81                          | 1.60 (1.22-2.10)                        |
| Remained poor sleep                                                   | 208                                  | 25           | 1.79                          | 1.63 (1.06-2.51)                        | 255                                      | 39           | 2.35                          | 2.01 (1.40-2.89)                        |

Abbreviations: CI, confidence interval; RR, risk ratio

<sup>a</sup>Adjusted for age (continuous)

<sup>b</sup>Adjusted for age (continuous), sex (women, men), education (primary school, high school, college ≤4 years, college >4 years), body mass index (continuous), relative change in body weight (continuous), smoking (never smoked, former smoker, current low-intensity smoker [<10 cigarettes per day], medium-intensity smoker [10-19 cigarettes per day], high-intensity smoker [20 or more cigarettes per day]), physical work demands (mostly sedentary, much walking, much walking or lifting, heavy physical work), and shift work (yes, no)

**Supplementary table 4.** Risk of chronic back pain and back-related disability at follow-up in 2017-19 associated with changes in sleep quality from 1995-97 to 2006-08 and adherence to physical activity recommendations in 2006-08. Main analysis repeated with additional adjustment for comorbid condition(s).

| Risk of back pain and change in sleep quality from 1995-97 to 2006-08 | Meeting physical activity guidelines |              |                               |                                         | Not meeting physical activity guidelines |              |                               |                                         |
|-----------------------------------------------------------------------|--------------------------------------|--------------|-------------------------------|-----------------------------------------|------------------------------------------|--------------|-------------------------------|-----------------------------------------|
|                                                                       | No. of persons                       | No. of cases | Age-adjusted, RR <sup>a</sup> | Multi-adjusted RR (95% CI) <sup>b</sup> | No. of persons                           | No. of cases | Age-adjusted, RR <sup>a</sup> | Multi-adjusted RR (95% CI) <sup>b</sup> |
| <b>Chronic back pain</b>                                              |                                      |              |                               |                                         |                                          |              |                               |                                         |
| Remained good sleep                                                   | 3,486                                | 636          | 1.00                          | 1.00 (reference)                        | 3,004                                    | 568          | 1.08                          | 1.01 (0.90-1.12)                        |
| Poor sleep to good sleep                                              | 207                                  | 50           | 1.35                          | 1.30 (0.98-1.71)                        | 270                                      | 66           | 1.36                          | 1.19 (0.91-1.55)                        |
| Good sleep to poor sleep                                              | 557                                  | 130          | 1.30                          | 1.27 (1.06-1.51)                        | 614                                      | 146          | 1.44                          | 1.26 (1.06-1.50)                        |
| Remained poor sleep                                                   | 208                                  | 56           | 1.57                          | 1.47 (1.15-1.88)                        | 255                                      | 75           | 1.88                          | 1.65 (1.34-2.01)                        |
| <b>Back-related disability</b>                                        |                                      |              |                               |                                         |                                          |              |                               |                                         |
| Remained good sleep                                                   | 3,486                                | 242          | 1.00                          | 1.00 (reference)                        | 3,004                                    | 239          | 1.19                          | 1.10 (0.91-1.33)                        |
| Poor sleep to good sleep                                              | 207                                  | 23           | 1.71                          | 1.65 (1.08-2.54)                        | 270                                      | 34           | 1.86                          | 1.57 (1.07-2.31)                        |
| Good sleep to poor sleep                                              | 557                                  | 62           | 1.63                          | 1.56 (1.18-2.07)                        | 614                                      | 69           | 1.81                          | 1.52 (1.16-2.00)                        |
| Remained poor sleep                                                   | 208                                  | 25           | 1.79                          | 1.64 (1.07-2.51)                        | 255                                      | 39           | 2.35                          | 1.98 (1.38-2.84)                        |

Abbreviations: CI, confidence interval; RR, risk ratio

<sup>a</sup>Adjusted for age (continuous)

<sup>b</sup>Adjusted for age (continuous), sex (women, men), education (primary school, high school, college ≤4 years, college >4 years), body mass index (continuous), relative change in body weight (continuous), smoking (never smoked, former smoker, current low-intensity smoker [ $<10$  cigarettes per day], medium-intensity smoker [10-19 cigarettes per day], high-intensity smoker [20 or more cigarettes per day]), and comorbid condition(s) (yes, no)

**Supplementary table 5.** Risk of chronic back pain and back-related disability at follow-up in 2017-19 associated with changes in sleep quality from 1995-97 to 2006-08 and adherence to physical activity recommendations in 2006-08. Main analysis repeated with additional adjustment for anxiety and/or depression.

| Risk of back pain and change in sleep quality from 1995-97 to 2006-08 | Meeting physical activity guidelines |              |                               |                                         | Not meeting physical activity guidelines |              |                               |                                         |
|-----------------------------------------------------------------------|--------------------------------------|--------------|-------------------------------|-----------------------------------------|------------------------------------------|--------------|-------------------------------|-----------------------------------------|
|                                                                       | No. of persons                       | No. of cases | Age-adjusted, RR <sup>a</sup> | Multi-adjusted RR (95% CI) <sup>b</sup> | No. of persons                           | No. of cases | Age-adjusted, RR <sup>a</sup> | Multi-adjusted RR (95% CI) <sup>b</sup> |
| <b>Chronic back pain</b>                                              |                                      |              |                               |                                         |                                          |              |                               |                                         |
| Remained good sleep                                                   | 3,486                                | 636          | 1.00                          | 1.00 (reference)                        | 3,004                                    | 568          | 1.08                          | 1.00 (0.90-1.12)                        |
| Poor sleep to good sleep                                              | 207                                  | 50           | 1.35                          | 1.30 (0.99-1.72)                        | 270                                      | 66           | 1.36                          | 1.19 (0.92-1.55)                        |
| Good sleep to poor sleep                                              | 557                                  | 130          | 1.30                          | 1.23 (1.03-1.47)                        | 614                                      | 146          | 1.44                          | 1.26 (1.06-1.50)                        |
| Remained poor sleep                                                   | 208                                  | 56           | 1.57                          | 1.44 (1.12-1.84)                        | 255                                      | 75           | 1.88                          | 1.57 (1.27-1.94)                        |
| <b>Back-related disability</b>                                        |                                      |              |                               |                                         |                                          |              |                               |                                         |
| Remained good sleep                                                   | 3,486                                | 242          | 1.00                          | 1.00 (reference)                        | 3,004                                    | 239          | 1.19                          | 1.10 (0.91-1.33)                        |
| Poor sleep to good sleep                                              | 207                                  | 23           | 1.71                          | 1.67 (1.09-2.56)                        | 270                                      | 34           | 1.86                          | 1.59 (1.08-2.33)                        |
| Good sleep to poor sleep                                              | 557                                  | 62           | 1.63                          | 1.53 (1.15-2.03)                        | 614                                      | 69           | 1.81                          | 1.55 (1.18-2.05)                        |
| Remained poor sleep                                                   | 208                                  | 25           | 1.79                          | 1.65 (1.07-2.52)                        | 255                                      | 39           | 2.35                          | 1.94 (1.33-2.82)                        |

Abbreviations: CI, confidence interval; RR, risk ratio

<sup>a</sup>Adjusted for age (continuous)

<sup>b</sup>Adjusted for age (continuous), sex (women, men), education (primary school, high school, college ≤4 years, college >4 years), body mass index (continuous), relative change in body weight (continuous), smoking (never smoked, former smoker, current low-intensity smoker [ $<10$  cigarettes per day], medium-intensity smoker [10-19 cigarettes per day], high-intensity smoker [20 or more cigarettes per day]), and anxiety and/or depression (yes, no)
